# Supplementary material for: Using an Inducible Promoter of a Gene Encoding Penicillium verruculosum Glucoamylase for Production of Enzyme Preparations with Enhanced Cellulase Performance
Source: PubMed Central journal article supplement (PMC5249098; doi:10.1371/journal.pone.0170404), 2017-01-20
Supplement: pone.0170404.s003.pdf [file pone.0170404.s003.pdf]

**S1 Table.** Activities of recombinant AnBGL clones in *P. verruculosum* culture liquids against natural and synthetic substrates (U/mg protein).

| Clones    | Protein (mg/mL) | <i>p</i> -NPG | Cellobiose | Avicel | Xylan |
|-----------|-----------------|---------------|------------|--------|-------|
| 1         | 5.23            | 0.32          | 3.9        | 1.49   | 22.6  |
| 2         | 5.77            | 0.95          | 4.4        | 1.50   | 32.5  |
| 3         | 5.78            | 0.83          | 4.3        | 1.33   | 27.0  |
| 5         | 5.64            | 1.17          | 4.3        | 1.51   | 28.4  |
| <b>6</b>  | 6.02            | <b>2.03</b>   | <b>5.8</b> | 1.43   | 26.7  |
| 7         | 6.12            | 1.35          | 5.1        | 1.43   | 33.1  |
| 8         | 5.72            | 1.07          | 4.3        | 1.42   | 25.5  |
| 9         | 5.77            | 0.73          | 4.2        | 1.36   | 27.9  |
| <b>10</b> | 5.83            | <b>1.69</b>   | <b>5.5</b> | 1.41   | 30.6  |
| 11        | 5.69            | 0.53          | 4.0        | 1.53   | 29.2  |
| 12        | 5.65            | 0.8           | 4.3        | 1.40   | 30.7  |
| 16        | 5.81            | 0.51          | 4.1        | 1.48   | 29.7  |
| 17        | 5.67            | 0.74          | 4.2        | 1.48   | 29.0  |
| 18        | 5.95            | 0.77          | 4.3        | 1.37   | 30.3  |
| 20        | 5.41            | 0.32          | 4.0        | 1.34   | 22.6  |
| 21        | 5.70            | 0.98          | 4.5        | 1.28   | 25.8  |
| 23        | 6.07            | 0.93          | 4.4        | 1.39   | 32.8  |
| 25        | 5.59            | 0.43          | 3.9        | 1.10   | 19.6  |
| <b>26</b> | 5.54            | <b>1.64</b>   | <b>5.5</b> | 1.12   | 24.6  |
| 27        | 5.40            | 0.70          | 3.8        | 1.31   | 19.5  |
| 28        | 5.3             | 0.59          | 3.9        | 1.29   | 18.7  |
| B1-537    | 4.75            | 0.20          | 2.5        | 1.24   | 19.8  |
