# Supplementary material for: Using an Inducible Promoter of a Gene Encoding Penicillium verruculosum Glucoamylase for Production of Enzyme Preparations with Enhanced Cellulase Performance
Source: PubMed Central journal article supplement (PMC5249098; doi:10.1371/journal.pone.0170404), 2017-01-20
Supplement: pone.0170404.s004.pdf [file pone.0170404.s004.pdf]

**S2 Table. Peptide fingerprinting of the heterologously expressed AnBGL and TrLPMO using MALDI-TOF mass spectrometry of the in-gel tryptic digests of proteins (S2 Fig).** The numeration of residues is given for mature proteins without signal peptides.

| AnBGL                  |                |                  | TrLPMO    |                |                  |
|------------------------|----------------|------------------|-----------|----------------|------------------|
| Peptide                | Observed $m/z$ | Calculated $m/z$ | Peptide   | Observed $m/z$ | Calculated $m/z$ |
| N100-R105              | 749.4          | 749.430          | G65-K70   | 598.4          | 598.331          |
| D342-K347              | 758.3          | 758.336          | T258-R263 | 650.3          | 650.347          |
| S577-K583              | 822.4          | 822.414          | T107-K113 | 885.5          | 885.472          |
| L739-R745              | 921.5          | 921.504          | I144-R156 | 1441.8         | 1441.780         |
| M821-R829              | 969.5          | 969.482          | I114-K143 | 3084.8         | 3084.564         |
| M821-R829 <sup>a</sup> | 985.5          | 985.477          | A71-K106  | 3966.9         | 3966.883         |
| N386-K395              | 985.5          | 985.531          |           |                |                  |
| V359-R367              | 1103.6         | 1103.596         |           |                |                  |
| G106-K116              | 1197.5         | 1197.520         |           |                |                  |
| G106-K116 <sup>a</sup> | 1213.5         | 1213.515         |           |                |                  |
| G117-R131              | 1392.8         | 1392.759         |           |                |                  |
| A28-K40                | 1404.7         | 1404.740         |           |                |                  |
| L330-R341              | 1491.7         | 1491.738         |           |                |                  |
| H171-R181              | 1492.7         | 1492.697         |           |                |                  |
| T205-R219              | 1862.9         | 1862.926         |           |                |                  |
| T205-R219 <sup>a</sup> | 1878.9         | 1878.921         |           |                |                  |
| L739-K755 <sup>b</sup> | 1963.1         | 1963.122         |           |                |                  |
| D80-K99                | 2128.0         | 2127.962         |           |                |                  |
| N456-K475              | 2177.1         | 2177.087         |           |                |                  |
| L398-R419 <sup>c</sup> | 2250.1         | 2250.045         |           |                |                  |
| N138-K158              | 2278.1         | 2278.139         |           |                |                  |
| D802-K820              | 2309.1         | 2309.072         |           |                |                  |
| R801-K820 <sup>b</sup> | 2465.2         | 2465.173         |           |                |                  |
| Q780-R801 <sup>b</sup> | 2707.2         | 2707.380         |           |                |                  |
| T476-R502              | 2769.3         | 2769.333         |           |                |                  |
| V325-K347 <sup>b</sup> | 2814.4         | 2814.375         |           |                |                  |
| T476-R503 <sup>b</sup> | 2925.4         | 2925.434         |           |                |                  |

<sup>a</sup> Oxidized methionine.

<sup>b</sup> Peptides containing missed cleavage(s) by trypsin.

<sup>c</sup> Acrylamide adduct on cysteine.
